# Supplementary material for: Preoperative Delays in the Treatment of DCIS and the Associated Incidence of Invasive Breast Cancer
Source: PubMed Central journal article supplement (PMC6949196; doi:10.1245/s10434-019-07844-4), 2019-09-27

## Online Only Content

eMethods: Statistical Methods

eTable 1: Included ICD-O-3 SEER Site/Histology Codes, Breast.

eTable 2: Multivariable Adjusted Associations between Patient Characteristics and Overall Survival

eTable 3: Sensitivity Analysis Examining Association between Patient Characteristics and Overall Survival in Patients with One Surgery Date Recorded (N=101,251).

eTable 4: Adjusted Associations between Characteristics and OS among Postoperative Patients with Non-Invasive Disease.

eTable 5: Adjusted Associations between Characteristics and OS among Postoperative Patients with Invasive Disease.

eTable 6: Multivariable Adjusted Associations between Patient Characteristics and Surgical Delay Grouping.

eTable 7: Point Estimates for 5-Year Overall Survival.

eTable 8: Sensitivity Analysis Examining Association between Patient Characteristics and Invasion in Patients with One Surgery Date Recorded (N=101,251).

eTable 9: Sensitivity Analysis Comparing 5-Year Overall Survival from Time of Diagnosis versus Time of Surgery.

eFigure 1: Overall survival of included DCIS patients grouped by delay interval. CI: confidence interval; DCIS: ductal carcinoma in situ; OS: overall survival.

eFigure 2: Interval length between diagnosis and definitive surgery. Panels represent distribution of patients with noninvasive (top panel) and invasive disease (bottom panel) on final pathology. Each bar represents 1 day.

## Statistical Methods

For each cohort, delay groups were compared using Chi-square tests and two sample t-tests. Due to the skewed nature of the data, quantile (median) regressions were used to analyze delays with adjustment for patient, tumor, and treatment characteristics. The bootstrap method with 500 repetitions was used for standard errors. Adjusted median delays were estimated using mean covariate values estimated in the models. Primary survival employed multivariable Cox proportional hazards models, which estimated hazard ratios associated with increasing delay (measured continuously as months) and OS, controlling for relevant covariates measuring patient (age, race, ethnicity, insurance, education, income, urban/rural location, Charlson score, year of diagnosis) , tumor (grade, estrogen receptor status), and treatment (type of surgery, receipt of chemotherapy, receipt of radiotherapy, receipt of endocrine therapy, transfer of care, distance to treatment facility, treating facility volume) factors. In secondary analyses, adjusted survival curves were obtained via inverse probability weighting, where the weights were obtained using generalized propensity scores. Unlike the primary analyses, the propensity score analyses used time until treatment categorized by interval (for ease of computation). Multinomial logistic regression was used to estimate propensity scores with restricted cubic splines for continuous variables, and weighted Kaplan Meier methods were used to estimate 5-year survival rates and to create OS curves. Bootstrap standard errors were used for 95% confidence intervals.

Among all patients, association between delays to surgery and invasion on final pathology was analyzed using the Wilcoxon rank sum test. The Cochran-Armitage trend test was used to analyze trends of invasion by delay group. Predictors of invasion were analyzed using multivariable logistic regression with adjustment for pre-treatment factors. To test whether effect of delay differed by final pathology, interaction terms between delay and invasive pathology were added to the multivariable Cox model.

Statistical significance was set at  $p= 0.05$  (two-sided). Analyses were performed using SAS software, version 9.4 (SAS Institute, Cary, NC) and STATA software, release 13 (StataCorp, College Station, TX).

**eTable 1: Included ICD-O-3 SEER Site/Histology Codes, Breast**

|                        | Site recode         | Histology | Histology Description           | Histology /Behavior | Histology/Behavior Description                       |
|------------------------|---------------------|-----------|---------------------------------|---------------------|------------------------------------------------------|
| <b>Ductal Subtypes</b> | C500-C506,C508-C509 | 805       | PAPILLARY CARCINOMA, NOS        | 8050/2              | Papillary carcinoma in situ                          |
|                        | C500-C506,C508-C509 | 805       | PAPILLARY CARCINOMA, NOS        | 8050/3              | Papillary carcinoma, NOS                             |
|                        | C500-C506,C508-C509 | 820       | ADENOID CYSTIC & CRIBRIFORM CA. | 8201/2              | Cribiform carcinoma in situ                          |
|                        | C500-C506,C508-C509 | 820       | ADENOID CYSTIC & CRIBRIFORM CA. | 8201/3              | Cribiform carcinoma                                  |
|                        | C500-C506,C508-C509 | 821       | ADENOCA. IN ADENOMA. POLYP      | 8211/3              | Tubular adenocarcinoma                               |
|                        | C500-C506,C508-C509 | 823       | SOLID CARCINOMA, NOS            | 8230/2              | Duct carcinoma in situ, solid type                   |
|                        | C500-C506,C508-C509 | 823       | SOLID CARCINOMA, NOS            | 8230/3              | Solid carcinoma, NOS                                 |
|                        | C500-C506,C508-C509 | 826       | PAPILLARY ADENOCARCINOMA, NOS   | 8260/3              | Papillary adenocarcinoma, NOS                        |
|                        | C500-C506,C508-C509 | 848       | MUCINOUS ADENOCARCINOMA         | 8480/3              | Mucinous adenocarcinoma                              |
|                        | C500-C506,C508-C509 | 848       | MUCINOUS ADENOCARCINOMA         | 8481/3              | Mucin-producing adenocarcinoma                       |
|                        | C500-C506,C508-C509 | 850       | DUCT CARCINOMA                  | 8500/2              | Intraductal carcinoma, noninfiltrating, NOS          |
|                        | C500-C506,C508-C509 | 850       | DUCT CARCINOMA                  | 8500/3              | Invasive carcinoma of no special type                |
|                        | C500-C506,C508-C509 | 850       | DUCT CARCINOMA                  | 8501/2              | Comedocarcinoma, non-infiltrating                    |
|                        | C500-C506,C508-C509 | 850       | DUCT CARCINOMA                  | 8501/3              | Comedocarcinoma, NOS                                 |
|                        | C500-C506,C508-C509 | 850       | DUCT CARCINOMA                  | 8502/3              | Secretory carcinoma of breast                        |
|                        | C500-C506,C508-C509 | 850       | DUCT CARCINOMA                  | 8503/2              | Noninfiltrating intraductal papillary adenocarcinoma |
|                        | C500-C506,C508-C509 | 850       | DUCT CARCINOMA                  | 8503/3              | Intraductal papillary adenocarcinoma with invasion   |
|                        | C500-C506,C508-C509 | 850       | DUCT CARCINOMA                  | 8504/2              | Noninfiltrating intracystic carcinoma                |
|                        | C500-C506,C508-C509 | 850       | DUCT CARCINOMA                  | 8504/3              | Intracystic carcinoma, NOS                           |

|                         |                     |     |                              |        |                                                            |
|-------------------------|---------------------|-----|------------------------------|--------|------------------------------------------------------------|
|                         | C500-C506,C508-C509 | 850 | DUCT CARCINOMA               | 8507/2 | Intraductal micropapillary carcinoma                       |
|                         | C500-C506,C508-C509 | 850 | DUCT CARCINOMA               | 8507/3 | Invasive micropapillary carcinoma                          |
|                         | C500-C506,C508-C509 | 852 | LOBULAR AND OTHER DUCTAL CA. | 8521/3 | Infiltrating ductular carcinoma                            |
|                         | C500-C506,C508-C509 | 852 | LOBULAR AND OTHER DUCTAL CA. | 8522/2 | Intraductal and lobular in situ carcinoma                  |
|                         | C500-C506,C508-C509 | 852 | LOBULAR AND OTHER DUCTAL CA. | 8522/3 | Infiltrating duct and lobular carcinoma                    |
|                         | C500-C506,C508-C509 | 852 | LOBULAR AND OTHER DUCTAL CA. | 8523/2 | Infiltr. duct mixed with other types of carcinoma, in situ |
|                         | C500-C506,C508-C509 | 852 | LOBULAR AND OTHER DUCTAL CA. | 8523/3 | Infiltr. duct mixed with other types of carcinoma          |
|                         | C500-C506,C508-C509 | 854 | PAGET DISEASE, MAMMARY       | 8540/3 | Paget disease, mammary                                     |
|                         | C500-C506,C508-C509 | 854 | PAGET DISEASE, MAMMARY       | 8541/3 | Paget dis. & infil. duct carcinoma                         |
|                         | C500-C506,C508-C509 | 854 | PAGET DISEASE, MAMMARY       | 8543/3 | Paget disease and intraductal ca.                          |
|                         |                     |     |                              |        |                                                            |
| <b>Lobular Subtypes</b> | C500-C506,C508-C509 | 852 | LOBULAR AND OTHER DUCTAL CA. | 8520/3 | Lobular carcinoma, NOS                                     |
|                         | C500-C506,C508-C509 | 852 | LOBULAR AND OTHER DUCTAL CA. | 8524/3 | Infiltrating lobular mixed with other types of carc.       |
|                         |                     |     |                              |        |                                                            |
| <b>Other Subtypes</b>   | C500-C506,C508-C509 | 800 | NEOPLASM                     | 8000/3 | Neoplasm, malignant                                        |
|                         | C500-C506,C508-C509 | 801 | CARCINOMA, NOS               | 8010/2 | Carcinoma in situ, NOS                                     |
|                         | C500-C506,C508-C509 | 801 | CARCINOMA, NOS               | 8010/3 | Carcinoma, NOS                                             |
|                         | C500-C506,C508-C509 | 802 | CARCINOMA, UNDIFF., NOS      | 8022/3 | Pleomorphic carcinoma                                      |
|                         | C500-C506,C508-C509 | 814 | ADENOCARCINOMA, NOS          | 8140/2 | Adenocarcinoma in situ                                     |
|                         | C500-C506,C508-C509 | 814 | ADENOCARCINOMA, NOS          | 8140/3 | Adenocarcinoma, NOS                                        |
|                         | C500-C506,C508-C509 | 825 | BRONCHIOLO-ALVEOLAR ADENOCA. | 8255/3 | Adenocarcinoma with mixed subtypes                         |

Adapted from: <https://seer.cancer.gov/icd-o-3>

**eTable 2: Multivariable Adjusted Associations between Patient Characteristics and Overall Survival**

| Characteristic                                             | N (%)          | HR (95%CI)            | P        |
|------------------------------------------------------------|----------------|-----------------------|----------|
| <b>Delay from Diagnosis to Surgery (30-Day Interval) §</b> | 140,615 (100)  | 1.074 (1.049, 1.099)  | < 0.0001 |
| <b>Age §</b>                                               | 140,615 (100)  | 1.075 (1.071, 1.079)  | < 0.0001 |
| <b>Race</b>                                                |                |                       |          |
| White                                                      | 115,163 (81.9) | Ref                   | < 0.0001 |
| Black                                                      | 17,042 (12.1)  | 1.088 (1.001, 1.183)  |          |
| Asian                                                      | 5,769 (4.1)    | 0.578 (0.481, 0.695)  |          |
| Other/Unknown                                              | 2,641 (1.9)    | 0.767 (0.597, 0.984)  |          |
| <b>Ethnicity</b>                                           |                |                       |          |
| Non-Hispanic                                               | 126,904 (90.2) | Ref                   | < 0.0001 |
| Hispanic                                                   | 7,016 (5.0)    | 0.644 (0.549, 0.755)  |          |
| Unknown                                                    | 6,695 (4.8)    | 1.049 (0.933, 1.180)  |          |
| <b>Insurance</b>                                           |                |                       |          |
| Private                                                    | 87,763 (62.4)  | Ref                   | < 0.0001 |
| Medicaid                                                   | 6,245 (4.4)    | 2.025 (1.764, 2.325)  |          |
| Medicare                                                   | 41,365 (29.4)  | 1.435 (1.333, 1.546)  |          |
| Uninsured                                                  | 2,127 (1.5)    | 1.737 (1.338, 2.256)  |          |
| Government                                                 | 1,499 (1.1)    | 1.542 (1.195, 1.990)  |          |
| Unknown                                                    | 1,616 (1.1)    | 1.457 (1.153, 1.840)  |          |
| <b>Education*</b>                                          |                |                       |          |
| >21%                                                       | 17,870 (12.7)  | Ref                   | 0.0010   |
| 13-20.9%                                                   | 31,550 (22.4)  | 0.962 (0.884, 1.048)  |          |
| 7-12.9%                                                    | 46,629 (33.2)  | 0.911 (0.830, 1.000)  |          |
| <7%                                                        | 43,912 (31.2)  | 0.819 (0.736, 0.911)  |          |
| Missing                                                    | 654 (0.5)      | 3.790 (0.594, 24.164) |          |
| <b>Annual Income</b>                                       |                |                       |          |
| <\$38,000                                                  | 18,831 (13.4)  | Ref                   | 0.0358   |
| \$38,000 - \$47,999                                        | 27,816 (19.8)  | 0.912 (0.840, 0.991)  |          |
| \$48,000 - \$62,999                                        | 36,940 (26.3)  | 0.907 (0.831, 0.991)  |          |
| ≥\$63,000                                                  | 56,337 (40.1)  | 0.852 (0.769, 0.944)  |          |
| Missing                                                    | 691 (0.5)      | 0.483 (0.088, 2.660)  |          |
| <b>Setting</b>                                             |                |                       |          |
| Large Metropolitan                                         | 79,489 (56.5)  | Ref                   | 0.1744   |
| Small Metropolitan                                         | 40,922 (29.1)  | 1.039 (0.971, 1.111)  |          |
| Suburban                                                   | 10,438 (7.4)   | 1.056 (0.946, 1.179)  |          |
| Rural                                                      | 5,869 (4.2)    | 0.920 (0.807, 1.049)  |          |
| Unknown                                                    | 3,897 (2.8)    | 0.917 (0.754, 1.115)  |          |
| <b>Distance to Treatment Facility (miles)</b>              |                |                       |          |
| ≤10                                                        | 78,606 (55.9)  | Ref                   | 0.1346   |
| 11-20                                                      | 33,342 (23.7)  | 0.963 (0.903, 1.028)  |          |
| 21-40                                                      | 16,577 (11.8)  | 0.929 (0.850, 1.015)  |          |
| >40                                                        | 11,360 (8.1)   | 0.884 (0.793, 0.986)  |          |
| Unknown                                                    | 730 (0.5)      | 1.563 (0.631, 3.872)  |          |
| <b>Transfer of Care</b>                                    |                |                       |          |
| No                                                         | 86,170 (61.3)  | Ref                   | 0.0367   |
| Yes                                                        | 39,602 (28.2)  | 0.918 (0.859, 0.980)  |          |
| Unknown                                                    | 14,843 (10.6)  | 0.990 (0.907, 1.082)  |          |
| <b>Treatment Facility Annual Volume</b>                    |                |                       |          |
| 0-17 patients (1 <sup>st</sup> Quartile)                   | 8,131 (5.8)    | Ref                   | < 0.0001 |
| 18-34 patients (2 <sup>nd</sup> Quartile)                  | 18,054 (12.8)  | 0.917 (0.816, 1.031)  |          |
| 35-67 patients (3 <sup>rd</sup> Quartile)                  | 35,074 (24.9)  | 0.906 (0.813, 1.008)  |          |
| >67 patients (4 <sup>th</sup> Quartile)                    | 79,356 (56.4)  | 0.796 (0.717, 0.883)  |          |
| <b>Year of Diagnosis §</b>                                 | 140,615 (100)  | 0.992 (0.980, 1.005)  | 0.2302   |
| <b>Charlson Comorbidity Score</b>                          |                |                       |          |
| 0                                                          | 120,676 (85.8) | Ref                   | < 0.0001 |
| 1                                                          | 16,780 (11.9)  | 1.634 (1.533, 1.742)  |          |
| 2                                                          | 2,659 (1.9)    | 2.813 (2.524, 3.135)  |          |
| ≥3                                                         | 500 (0.4)      | 4.777 (3.859, 5.914)  |          |

| <b>Grade</b>                        |                |                      |          |
|-------------------------------------|----------------|----------------------|----------|
| Well Differentiated                 | 17,357 (12.3)  | Ref                  | 0.1646   |
| Moderately Differentiated           | 47,300 (33.6)  | 1.011 (0.938, 1.090) |          |
| Poorly Differentiated               | 47,039 (33.5)  | 1.059 (0.981, 1.143) |          |
| Undifferentiated/Anaplastic         | 3,684 (2.6)    | 0.970 (0.837, 1.124) |          |
| Unknown                             | 25,235 (17.9)  | 0.975 (0.895, 1.062) |          |
| <b>Surgery Type</b>                 |                |                      |          |
| Breast Conservation                 | 95,326 (67.8)  | Ref                  | < 0.0001 |
| Mastectomy                          | 25,615 (18.2)  | 0.947 (0.883, 1.015) |          |
| Mastectomy & Reconstruction         | 27,496 (19.6)  | 0.623 (0.550, 0.706) |          |
| <b>Receipt of Chemotherapy</b>      |                |                      |          |
| No                                  | 136,310 (96.9) | Ref                  | < 0.0001 |
| Yes                                 | 4,305 (3.1)    | 1.902 (1.628, 2.224) |          |
| <b>Receipt of Radiotherapy</b>      |                |                      |          |
| No                                  | 70,546 (50.2)  | Ref                  | < 0.0001 |
| Yes                                 | 70,069 (49.8)  | 0.700 (0.654, 0.749) |          |
| <b>Receipt of Endocrine Therapy</b> |                |                      |          |
| No                                  | 85,881 (61.1)  | Ref                  | < 0.0001 |
| Yes                                 | 54,734 (38.9)  | 0.853 (0.803, 0.906) |          |
| <b>Estrogen Receptor Status</b>     |                |                      |          |
| Negative                            | 19,836 (14.1)  | Ref                  | 0.0622   |
| Positive                            | 107,305 (76.3) | 0.921 (0.859, 0.988) |          |
| Unknown                             | 13,474 (9.6)   | 0.918 (0.838, 1.004) |          |

CI, confidence interval; HR, hazard ratio; Ref, reference group; \*, percent of adults without a high school diploma by zip code; §, continuous variable.

**eTable 3: Sensitivity Analysis Examining Association between Patient Characteristics and Overall Survival in Patients with One Surgery Date Recorded (N=101,251)**

| Characteristic                                             | HR (95%CI)            | P        |
|------------------------------------------------------------|-----------------------|----------|
| <b>Delay from Diagnosis to Surgery (30-Day Interval) §</b> | 1.122 (1.087, 1.158)  | < 0.0001 |
| <b>Age §</b>                                               | 1.075 (1.071, 1.080)  | < 0.0001 |
| <b>Race</b>                                                |                       |          |
| White                                                      | Ref                   |          |
| Black                                                      | 1.046 (0.945, 1.157)  | 0.3872   |
| Asian                                                      | 0.538 (0.441, 0.656)  | < 0.0001 |
| Other/Unknown                                              | 0.771 (0.594, 1.001)  | 0.0509   |
| <b>Ethnicity</b>                                           |                       |          |
| Non-Hispanic                                               | Ref                   |          |
| Hispanic                                                   | 0.649 (0.545, 0.774)  | < 0.0001 |
| Unknown                                                    | 1.068 (0.935, 1.219)  | 0.3352   |
| <b>Insurance</b>                                           |                       |          |
| Private                                                    | Ref                   |          |
| Medicaid                                                   | 2.212 (1.887, 2.592)  | < 0.0001 |
| Medicare                                                   | 1.430 (1.305, 1.567)  | < 0.0001 |
| Uninsured                                                  | 1.585 (1.160, 2.165)  | 0.0038   |
| Government                                                 | 1.463 (1.088, 1.968)  | 0.0118   |
| Unknown                                                    | 1.363 (1.010, 1.839)  | 0.0431   |
| <b>Education*</b>                                          |                       |          |
| >21%                                                       | Ref                   |          |
| 13-20.9%                                                   | 0.966 (0.876, 1.066)  | 0.4907   |
| 7-12.9%                                                    | 0.901 (0.810, 1.003)  | 0.0559   |
| <7%                                                        | 0.812 (0.718, 0.917)  | 0.0008   |
| Missing                                                    | 2.655 (0.361, 19.509) | 0.3372   |
| <b>Annual Income</b>                                       |                       |          |
| <\$38,000                                                  | Ref                   |          |
| \$38,000 - \$47,999                                        | 0.911 (0.826, 1.006)  | 0.0654   |
| \$48,000 - \$62,999                                        | 0.936 (0.844, 1.038)  | 0.2103   |
| ≥\$63,000                                                  | 0.853 (0.756, 0.964)  | 0.0107   |
| Missing                                                    | 0.708 (0.115, 4.343)  | 0.7088   |
| <b>Setting</b>                                             |                       |          |
| Large Metropolitan                                         | Ref                   |          |
| Small Metropolitan                                         | 1.049 (0.969, 1.135)  | 0.2382   |
| Suburban                                                   | 1.043 (0.917, 1.185)  | 0.5224   |
| Rural                                                      | 0.932 (0.805, 1.080)  | 0.3519   |
| Unknown                                                    | 0.930 (0.744, 1.163)  | 0.5260   |
| <b>Distance to Treatment Facility (miles)</b>              |                       |          |
| ≤10                                                        | Ref                   |          |
| 11-20                                                      | 0.963 (0.891, 1.041)  | 0.3441   |
| 21-40                                                      | 0.963 (0.867, 1.071)  | 0.4912   |
| >40                                                        | 0.916 (0.808, 1.040)  | 0.1760   |
| Unknown                                                    | 1.538 (0.554, 4.268)  | 0.4087   |
| <b>Transfer of Care</b>                                    |                       |          |
| No                                                         | Ref                   |          |
| Yes                                                        | 0.921 (0.854, 0.993)  | 0.0321   |
| Unknown                                                    | 0.957 (0.859, 1.066)  | 0.4221   |



|                                           |                      |          |
|-------------------------------------------|----------------------|----------|
| <b>Treatment Facility Annual Volume</b>   |                      |          |
| 0-17 patients (1 <sup>st</sup> Quartile)  | Ref                  |          |
| 18-34 patients (2 <sup>nd</sup> Quartile) | 0.914 (0.795, 1.051) | 0.2084   |
| 35-67 patients (3 <sup>rd</sup> Quartile) | 0.914 (0.804, 1.038) | 0.1665   |
| >67 patients (4 <sup>th</sup> Quartile)   | 0.820 (0.724, 0.930) | 0.0019   |
| <b>Year of Diagnosis §</b>                | 0.998 (0.984, 1.013) | 0.8168   |
| <b>Charlson Comorbidity Score</b>         |                      |          |
| 0                                         | Ref                  |          |
| 1                                         | 1.655 (1.535, 1.785) | < 0.0001 |
| 2                                         | 2.761 (2.429, 3.139) | < 0.0001 |
| ≥3                                        | 4.898 (3.851, 6.229) | < 0.0001 |
| <b>Grade</b>                              |                      |          |
| Well Differentiated                       | Ref                  |          |
| Moderately Differentiated                 | 1.004 (0.919, 1.098) | 0.9281   |
| Poorly Differentiated                     | 1.042 (0.952, 1.140) | 0.3711   |
| Undifferentiated/Anaplastic               | 0.908 (0.752, 1.096) | 0.3153   |
| Unknown                                   | 0.970 (0.877, 1.073) | 0.5571   |
| <b>Surgery Type</b>                       |                      |          |
| Breast Conservation                       | Ref                  |          |
| Mastectomy                                | 0.933 (0.859, 1.013) | 0.1005   |
| Mastectomy & Reconstruction               | 0.637 (0.548, 0.740) | < 0.0001 |
| <b>Receipt of Chemotherapy</b>            |                      |          |
| No                                        | Ref                  |          |
| Yes                                       | 1.946 (1.608, 2.355) | < 0.0001 |
| <b>Receipt of Radiotherapy</b>            |                      |          |
| No                                        | Ref                  |          |
| Yes                                       | 0.687 (0.635, 0.743) | < 0.0001 |
| <b>Receipt of Endocrine Therapy</b>       |                      |          |
| No                                        | Ref                  |          |
| Yes                                       | 0.846 (0.788, 0.909) | < 0.0001 |
| <b>Estrogen Receptor Status</b>           |                      |          |
| Negative                                  | Ref                  |          |
| Positive                                  | 0.899 (0.828, 0.975) | 0.0105   |
| Unknown                                   | 0.896 (0.803, 0.999) | 0.0479   |

CI, confidence interval; HR, hazard ratio; Ref, reference group; \*, percent of adults without a high school diploma by zip code; §, continuous variable.

**eTable 4: Adjusted Associations between Characteristics and OS among Postoperative Patients with Non-Invasive Disease**

| Characteristic                                             | HR (95%CI)            | P        |
|------------------------------------------------------------|-----------------------|----------|
| <b>Delay from Diagnosis to Surgery (30-Day Interval) §</b> | 1.073 (1.047, 1.101)  | < 0.0001 |
| <b>Age §</b>                                               | 1.078 (1.074, 1.081)  | < 0.0001 |
| <b>Race</b>                                                |                       |          |
| White                                                      | Ref                   |          |
| Black                                                      | 1.075 (0.985, 1.174)  | 0.1053   |
| Asian                                                      | 0.616 (0.505, 0.751)  | < 0.0001 |
| Other/Unknown                                              | 0.739 (0.566, 0.965)  | 0.0263   |
| <b>Ethnicity</b>                                           |                       |          |
| Non-Hispanic                                               | Ref                   |          |
| Hispanic                                                   | 0.655 (0.551, 0.778)  | < 0.0001 |
| Unknown                                                    | 1.064 (0.942, 1.202)  | 0.3181   |
| <b>Insurance</b>                                           |                       |          |
| Private                                                    | Ref                   |          |
| Medicaid                                                   | 1.935 (1.653, 2.266)  | < 0.0001 |
| Medicare                                                   | 1.405 (1.302, 1.517)  | < 0.0001 |
| Uninsured                                                  | 1.842 (1.386, 2.447)  | < 0.0001 |
| Government                                                 | 1.533 (1.166, 2.017)  | 0.0022   |
| Unknown                                                    | 1.456 (1.141, 1.860)  | 0.0026   |
| <b>Education*</b>                                          |                       |          |
| >21%                                                       | Ref                   |          |
| 13-20.9%                                                   | 0.981 (0.896, 1.075)  | 0.6840   |
| 7-12.9%                                                    | 0.932 (0.843, 1.029)  | 0.1641   |
| <7%                                                        | 0.829 (0.739, 0.930)  | 0.0014   |
| Missing                                                    | 2.616 (0.363, 18.856) | 0.3401   |
| <b>Annual Income</b>                                       |                       |          |
| <\$38,000                                                  | Ref                   |          |
| \$38,000 - \$47,999                                        | 0.901 (0.825, 0.985)  | 0.0223   |
| \$48,000 - \$62,999                                        | 0.904 (0.822, 0.994)  | 0.0380   |
| ≥\$63,000                                                  | 0.838 (0.751, 0.936)  | 0.0017   |
| Missing                                                    | 0.720 (0.116, 4.475)  | 0.7246   |
| <b>Setting</b>                                             |                       |          |
| Large Metropolitan                                         | Ref                   |          |
| Small Metropolitan                                         | 1.025 (0.956, 1.099)  | 0.4939   |
| Suburban                                                   | 1.026 (0.911, 1.155)  | 0.6769   |
| Rural                                                      | 0.920 (0.799, 1.058)  | 0.2413   |
| Unknown                                                    | 0.938 (0.760, 1.156)  | 0.5465   |
| <b>Distance to Treatment Facility (miles)</b>              |                       |          |
| ≤10                                                        | Ref                   |          |
| 11-20                                                      | 0.976 (0.910, 1.046)  | 0.4917   |
| 21-40                                                      | 0.936 (0.852, 1.029)  | 0.1730   |
| >40                                                        | 0.863 (0.768, 0.970)  | 0.0138   |
| Unknown                                                    | 1.576 (0.635, 3.911)  | 0.3271   |
| <b>Transfer of Care</b>                                    |                       |          |
| No                                                         | Ref                   |          |
| Yes                                                        | 0.910 (0.848, 0.976)  | 0.0088   |
| Unknown                                                    | 0.967 (0.879, 1.064)  | 0.4960   |

|                                           |                      |          |
|-------------------------------------------|----------------------|----------|
| <b>Treatment Facility Annual Volume</b>   |                      |          |
| 0-17 patients (1 <sup>st</sup> Quartile)  | Ref                  |          |
| 18-34 patients (2 <sup>nd</sup> Quartile) | 0.929 (0.822, 1.051) | 0.2441   |
| 35-67 patients (3 <sup>rd</sup> Quartile) | 0.915 (0.817, 1.025) | 0.1247   |
| >67 patients (4 <sup>th</sup> Quartile)   | 0.805 (0.721, 0.898) | 0.0001   |
| <b>Year of Diagnosis §</b>                | 0.994 (0.980, 1.007) | 0.3638   |
| <b>Charlson Comorbidity Score</b>         |                      |          |
| 0                                         | Ref                  |          |
| 1                                         | 1.635 (1.529, 1.748) | < 0.0001 |
| 2                                         | 2.930 (2.605, 3.295) | < 0.0001 |
| ≥3                                        | 4.781 (3.837, 5.957) | < 0.0001 |
| <b>Grade</b>                              |                      |          |
| Well Differentiated                       | Ref                  |          |
| Moderately Differentiated                 | 1.049 (0.965, 1.141) | 0.2595   |
| Poorly Differentiated                     | 1.094 (1.003, 1.192) | 0.0415   |
| Undifferentiated/Anaplastic               | 0.993 (0.852, 1.158) | 0.9301   |
| Unknown                                   | 1.024 (0.932, 1.126) | 0.6164   |
| <b>Surgery Type</b>                       |                      |          |
| Breast Conservation                       | Ref                  |          |
| Mastectomy                                | 0.932 (0.866, 1.002) | 0.0569   |
| Mastectomy & Reconstruction               | 0.576 (0.498, 0.666) | < 0.0001 |
| <b>Receipt of Chemotherapy</b>            |                      |          |
| No                                        | Ref                  |          |
| Yes                                       | 1.819 (1.347, 2.455) | < 0.0001 |
| <b>Receipt of Radiotherapy</b>            |                      |          |
| No                                        | Ref                  |          |
| Yes                                       | 0.707 (0.660, 0.759) | < 0.0001 |
| <b>Receipt of Endocrine Therapy</b>       |                      |          |
| No                                        | Ref                  |          |
| Yes                                       | 0.857 (0.803, 0.914) | < 0.0001 |
| <b>Estrogen Receptor Status</b>           |                      |          |
| Negative                                  | Ref                  |          |
| Positive                                  | 0.970 (0.897, 1.048) | 0.4385   |
| Unknown                                   | 0.981 (0.890, 1.082) | 0.7075   |

CI, confidence interval; HR, hazard ratio; OS, overall survival; Ref, reference group; \*, percent of adults without a high school diploma by zip code; §, continuous variable.

**eTable 5: Adjusted Associations between Characteristics and OS among Postoperative Patients with Invasive Disease**

| Characteristic                                             | HR (95%CI)                     | P        |
|------------------------------------------------------------|--------------------------------|----------|
| <b>Delay from Diagnosis to Surgery (30-Day Interval) §</b> | 1.068 (1.006, 1.134)           | 0.0306   |
| <b>Age §</b>                                               | 1.057 (1.047, 1.068)           | < 0.0001 |
| <b>Race</b>                                                |                                |          |
| White                                                      | Ref                            |          |
| Black                                                      | 1.150 (0.940, 1.407)           | 0.1741   |
| Asian                                                      | 0.358 (0.205, 0.623)           | 0.0003   |
| Other/Unknown                                              | 1.013 (0.571, 1.795)           | 0.9657   |
| <b>Ethnicity</b>                                           |                                |          |
| Non-Hispanic                                               | Ref                            |          |
| Hispanic                                                   | 0.554 (0.366, 0.840)           | 0.0054   |
| Unknown                                                    | 0.954 (0.689, 1.321)           | 0.7754   |
| <b>Insurance</b>                                           |                                |          |
| Private                                                    | Ref                            |          |
| Medicaid                                                   | 2.492 (1.840, 3.377)           | < 0.0001 |
| Medicare                                                   | 1.661 (1.336, 2.065)           | < 0.0001 |
| Uninsured                                                  | 1.254 (0.613, 2.565)           | 0.5357   |
| Government                                                 | 1.558 (0.786, 3.087)           | 0.2038   |
| Unknown                                                    | 1.535 (0.733, 3.215)           | 0.2559   |
| <b>Education*</b>                                          |                                |          |
| >21%                                                       | Ref                            |          |
| 13-20.9%                                                   | 0.831 (0.673, 1.025)           | 0.0836   |
| 7-12.9%                                                    | 0.760 (0.602, 0.959)           | 0.0207   |
| <7%                                                        | 0.742 (0.561, 0.981)           | 0.0360   |
| Missing                                                    | 8796.560 (1754.674, 44099.050) | < 0.0001 |
| <b>Annual Income</b>                                       |                                |          |
| <\$38,000                                                  | Ref                            |          |
| \$38,000 - \$47,999                                        | 0.961 (0.773, 1.194)           | 0.7185   |
| \$48,000 - \$62,999                                        | 0.915 (0.727, 1.151)           | 0.4460   |
| ≥\$63,000                                                  | 0.940 (0.716, 1.234)           | 0.6545   |
| Missing                                                    | 0 0 0                          | < 0.0001 |
| <b>Setting</b>                                             |                                |          |
| Large Metropolitan                                         | Ref                            |          |
| Small Metropolitan                                         | 1.144 (0.956, 1.369)           | 0.1418   |
| Suburban                                                   | 1.227 (0.942, 1.600)           | 0.1299   |
| Rural                                                      | 0.893 (0.619, 1.289)           | 0.5457   |
| Unknown                                                    | 0.706 (0.421, 1.183)           | 0.1865   |
| <b>Distance to Treatment Facility (miles)</b>              |                                |          |
| ≤10                                                        | Ref                            |          |
| 11-20                                                      | 0.888 (0.743, 1.061)           | 0.1917   |
| 21-40                                                      | 0.909 (0.716, 1.154)           | 0.4331   |
| >40                                                        | 0.988 (0.757, 1.292)           | 0.9323   |
| Unknown                                                    | 2.776 (1.003, 7.681)           | 0.0493   |
| <b>Transfer of Care</b>                                    |                                |          |
| No                                                         | Ref                            |          |
| Yes                                                        | 0.926 (0.781, 1.098)           | 0.3754   |
| Unknown                                                    | 1.146 (0.891, 1.475)           | 0.2871   |

|                                           |                      |          |
|-------------------------------------------|----------------------|----------|
| <b>Treatment Facility Annual Volume</b>   |                      |          |
| 0-17 patients (1 <sup>st</sup> Quartile)  | Ref                  |          |
| 18-34 patients (2 <sup>nd</sup> Quartile) | 0.753 (0.544, 1.044) | 0.0891   |
| 35-67 patients (3 <sup>rd</sup> Quartile) | 0.775 (0.575, 1.045) | 0.0951   |
| >67 patients (4 <sup>th</sup> Quartile)   | 0.646 (0.484, 0.862) | 0.0030   |
| <b>Year of Diagnosis §</b>                | 0.979 (0.943, 1.016) | 0.2601   |
| <b>Charlson Comorbidity Score</b>         |                      |          |
| 0                                         | Ref                  |          |
| 1                                         | 1.638 (1.379, 1.945) | < 0.0001 |
| 2                                         | 2.104 (1.550, 2.856) | < 0.0001 |
| ≥3                                        | 4.781 (2.526, 9.050) | < 0.0001 |
| <b>Grade</b>                              |                      |          |
| Well Differentiated                       | Ref                  |          |
| Moderately Differentiated                 | 0.875 (0.734, 1.043) | 0.1363   |
| Poorly Differentiated                     | 1.098 (0.911, 1.324) | 0.3256   |
| Undifferentiated/Anaplastic               | 1.606 (0.956, 2.696) | 0.0733   |
| Unknown                                   | 0.794 (0.629, 1.003) | 0.0527   |
| <b>Surgery Type</b>                       |                      |          |
| Breast Conservation                       | Ref                  |          |
| Mastectomy                                | 0.951 (0.748, 1.208) | 0.6792   |
| Mastectomy & Reconstruction               | 0.727 (0.549, 0.964) | 0.0266   |
| <b>Receipt of Chemotherapy</b>            |                      |          |
| No                                        | Ref                  |          |
| Yes                                       | 1.315 (1.078, 1.604) | 0.0068   |
| <b>Receipt of Radiotherapy</b>            |                      |          |
| No                                        | Ref                  |          |
| Yes                                       | 0.623 (0.486, 0.799) | 0.0002   |
| <b>Receipt of Endocrine Therapy</b>       |                      |          |
| No                                        | Ref                  |          |
| Yes                                       | 0.747 (0.633, 0.881) | 0.0005   |
| <b>Estrogen Receptor Status</b>           |                      |          |
| Negative                                  | Ref                  |          |
| Positive                                  | 0.842 (0.698, 1.016) | 0.0720   |
| Unknown                                   | 0.688 (0.477, 0.991) | 0.0446   |

CI, confidence interval; HR, hazard ratio; OS, overall survival; Ref, reference group; \*, percent of adults without a high school diploma by zip code, §, continuous variable.

**eTable 6: Multivariable Adjusted Associations between Patient Characteristics and Surgical Delay Grouping**

| Time to Surgery      | ≤30 Days<br>(n=52,816)<br>N (%) | 31-60 Days<br>(n=54,680)<br>N (%) | 61-90 Days<br>(n=20,600)<br>N (%) | 91-120 Days<br>(n=7,326)<br>N (%) | 121-180 Days<br>(n=3,899)<br>N (%) | 180-240 Days<br>(n=880)<br>N (%) | 241-365 Days<br>(n=414)<br>N (%) | Total<br>(n=140,615) | P      |
|----------------------|---------------------------------|-----------------------------------|-----------------------------------|-----------------------------------|------------------------------------|----------------------------------|----------------------------------|----------------------|--------|
| <b>Age</b>           |                                 |                                   |                                   |                                   |                                    |                                  |                                  |                      |        |
| <50                  | 10844 (20.5)                    | 14132 (25.8)                      | 6460 (31.4)                       | 2403 (32.8)                       | 1364 (35.0)                        | 309 (35.1)                       | 150 (36.2)                       | 35662 (25.4)         | <0.001 |
| 50-59                | 14791 (28.0)                    | 15948 (29.2)                      | 6003 (29.1)                       | 2211 (30.2)                       | 1163 (29.8)                        | 263 (29.9)                       | 111 (26.8)                       | 40490 (28.8)         |        |
| 60-69                | 15042 (28.5)                    | 14231 (26.0)                      | 4973 (24.1)                       | 1684 (23.0)                       | 870 (22.3)                         | 189 (21.5)                       | 92 (22.2)                        | 37081 (26.4)         |        |
| ≥70                  | 12139 (23.0)                    | 10369 (19.0)                      | 3164 (15.4)                       | 1028 (14.0)                       | 502 (12.9)                         | 119 (13.5)                       | 61 (14.7)                        | 27382 (19.5)         |        |
| <b>Race</b>          |                                 |                                   |                                   |                                   |                                    |                                  |                                  |                      |        |
| White                | 45274 (85.7)                    | 44851 (82.0)                      | 16034 (77.8)                      | 5421 (74.0)                       | 2738 (70.2)                        | 586 (66.6)                       | 259 (62.6)                       | 115163 (81.9)        | <0.001 |
| Black                | 4885 (9.2)                      | 6556 (12.0)                       | 3106 (15.1)                       | 1339 (18.3)                       | 839 (21.5)                         | 202 (23.0)                       | 115 (27.8)                       | 17042 (12.1)         |        |
| Asian                | 1804 (3.4)                      | 2233 (4.1)                        | 1027 (5.0)                        | 389 (5.3)                         | 222 (5.7)                          | ∅                                | ∅                                | 5769 (4.1)           |        |
| Other/Unknown        | 853 (1.6)                       | 1040 (1.9)                        | 433 (2.1)                         | 177 (2.4)                         | 100 (2.6)                          | ∅                                | ∅                                | 2641 (1.9)           |        |
| <b>Ethnicity</b>     |                                 |                                   |                                   |                                   |                                    |                                  |                                  |                      |        |
| Non-Hispanic         | 48083 (91.0)                    | 49456 (90.4)                      | 18380 (89.2)                      | 6517 (89.0)                       | 3355 (86.0)                        | 759 (86.3)                       | 354 (85.5)                       | 126904 (90.2)        | <0.001 |
| Hispanic             | 1954 (3.7)                      | 2673 (4.9)                        | 1358 (6.6)                        | 527 (7.2)                         | 376 (9.6)                          | 89 (10.1)                        | 39 (9.4)                         | 7016 (5.0)           |        |
| Unknown              | 2779 (5.3)                      | 2551 (4.7)                        | 862 (4.2)                         | 282 (3.8)                         | 168 (4.3)                          | 32 (3.6)                         | 21 (5.1)                         | 6695 (4.8)           |        |
| <b>Insurance</b>     |                                 |                                   |                                   |                                   |                                    |                                  |                                  |                      |        |
| Medicaid             | 1633 (3.1)                      | 2344 (4.3)                        | 1232 (6.0)                        | 549 (7.5)                         | 362 (9.3)                          | 85 (9.7)                         | 40 (9.7)                         | 6245 (4.4)           | <0.001 |
| Medicare             | 17801 (33.7)                    | 15613 (28.6)                      | 5045 (24.5)                       | 1732 (23.6)                       | 851 (21.8)                         | 217 (24.7)                       | 106 (25.6)                       | 41365 (29.4)         |        |
| Uninsured            | 609 (1.2)                       | 774 (1.4)                         | 407 (2.0)                         | 161 (2.2)                         | 129 (3.3)                          | 23 (2.6)                         | 24 (5.8)                         | 2127 (1.5)           |        |
| Government           | 491 (0.9)                       | 596 (1.1)                         | 215 (1.0)                         | 115 (1.6)                         | 57 (1.5)                           | ∅                                | ∅                                | 1499 (1.1)           |        |
| Private              | 31716 (60.0)                    | 34776 (63.6)                      | 13416 (65.1)                      | 4670 (63.7)                       | 2434 (62.4)                        | 523 (59.4)                       | 228 (55.1)                       | 87763 (62.4)         |        |
| Unknown              | 566 (1.1)                       | 577 (1.1)                         | 285 (1.4)                         | 99 (1.4)                          | 66 (1.7)                           | ∅                                | ∅                                | 1616 (1.1)           |        |
| <b>Education*</b>    |                                 |                                   |                                   |                                   |                                    |                                  |                                  |                      |        |
| >21%                 | 6263 (11.9)                     | 6732 (12.3)                       | 2826 (13.7)                       | 1107 (15.1)                       | 710 (18.2)                         | ∅                                | ∅                                | 17870 (12.7)         | <0.001 |
| 13-20.9%             | 12019 (22.8)                    | 12104 (22.1)                      | 4571 (22.2)                       | 1694 (23.1)                       | 829 (21.3)                         | 228 (25.9)                       | 105 (25.4)                       | 31550 (22.4)         |        |
| 7-12.9%              | 17849 (33.8)                    | 18150 (33.2)                      | 6726 (32.7)                       | 2313 (31.6)                       | 1212 (31.1)                        | 258 (29.3)                       | 121 (29.2)                       | 46629 (33.2)         |        |
| <7%                  | 16403 (31.1)                    | 17461 (31.9)                      | 6401 (31.1)                       | 2179 (29.7)                       | 1129 (29.0)                        | 237 (26.9)                       | 102 (24.6)                       | 43912 (31.2)         |        |
| Missing              | 282 (0.5)                       | 233 (0.4)                         | 76 (0.4)                          | 33 (0.5)                          | 19 (0.5)                           | ∅                                | ∅                                | 654 (0.5)            |        |
| <b>Annual Income</b> |                                 |                                   |                                   |                                   |                                    |                                  |                                  |                      |        |
| <\$38,000            | 7088 (13.4)                     | 7071 (12.9)                       | 2743 (13.3)                       | 1090 (14.9)                       | 617 (15.8)                         | ∅                                | ∅                                | 18831 (13.4)         | <0.001 |
| \$38,000 - \$47,999  | 11208 (21.2)                    | 10509 (19.2)                      | 3811 (18.5)                       | 1357 (18.5)                       | 683 (17.5)                         | 168 (19.1)                       | 80 (19.3)                        | 27816 (19.8)         |        |
| \$48,000 - \$62,999  | 14303 (27.1)                    | 14280 (26.1)                      | 5326 (25.9)                       | 1769 (24.1)                       | 939 (24.1)                         | 211 (24.0)                       | 112 (27.1)                       | 36940 (26.3)         |        |

|                                               |              |              |              |             |             |            |            |              |        |
|-----------------------------------------------|--------------|--------------|--------------|-------------|-------------|------------|------------|--------------|--------|
| ≥\$63,000                                     | 19918 (37.7) | 22577 (41.3) | 8637 (41.9)  | 3077 (42.0) | 1638 (42.0) | 348 (39.5) | 142 (34.3) | 56337 (40.1) |        |
| Missing                                       | 299 (0.6)    | 243 (0.4)    | 83 (0.4)     | 33 (0.5)    | 22 (0.6)    | ∅          | ∅          | 691 (0.5)    |        |
| <b>Setting</b>                                |              |              |              |             |             |            |            |              |        |
| Large Metropolitan                            | 26678 (50.5) | 31749 (58.1) | 12839 (62.3) | 4766 (65.1) | 2589 (66.4) | 588 (66.8) | 280 (67.6) | 79489 (56.5) | <0.001 |
| Small Metropolitan                            | 17220 (32.6) | 15501 (28.3) | 5338 (25.9)  | 1726 (23.6) | 867 (22.2)  | 187 (21.3) | 83 (20.0)  | 40922 (29.1) |        |
| Suburban                                      | 4653 (8.8)   | 3854 (7.0)   | 1224 (5.9)   | 411 (5.6)   | 223 (5.7)   | 46 (5.2)   | 27 (6.5)   | 10438 (7.4)  |        |
| Rural                                         | 2842 (5.4)   | 2059 (3.8)   | 640 (3.1)    | 198 (2.7)   | 97 (2.5)    | ∅          | ∅          | 5869 (4.2)   |        |
| Unknown                                       | 1423 (2.7)   | 1517 (2.8)   | 559 (2.7)    | 225 (3.1)   | 123 (3.2)   | ∅          | ∅          | 3897 (2.8)   |        |
| <b>Distance to Treatment Facility (miles)</b> |              |              |              |             |             |            |            |              |        |
| ≤10                                           | 29924 (56.7) | 30308 (55.4) | 11384 (55.3) | 4098 (55.9) | 2181 (55.9) | 495 (56.3) | 216 (52.2) | 78606 (55.9) | <0.001 |
| 11-20                                         | 12472 (23.6) | 13178 (24.1) | 4849 (23.5)  | 1673 (22.8) | 885 (22.7)  | 192 (21.8) | 93 (22.5)  | 33342 (23.7) |        |
| 21-40                                         | 6291 (11.9)  | 6514 (11.9)  | 2357 (11.4)  | 838 (11.4)  | 434 (11.1)  | ∅          | ∅          | 16577 (11.8) |        |
| >40                                           | 3838 (7.3)   | 4391 (8.0)   | 1922 (9.3)   | 681 (9.3)   | 384 (9.8)   | ∅          | ∅          | 11360 (8.1)  |        |
| Unknown                                       | 291 (0.6)    | 289 (0.5)    | 88 (0.4)     | 36 (0.5)    | 15 (0.4)    | ∅          | ∅          | 730 (0.5)    |        |
| <b>Transfer of Care</b>                       |              |              |              |             |             |            |            |              |        |
| No                                            | 34891 (66.1) | 33133 (60.6) | 11541 (56.0) | 4016 (54.8) | 1996 (51.2) | 410 (46.6) | 183 (44.2) | 86170 (61.3) | <0.001 |
| Yes                                           | 11409 (21.6) | 15950 (29.2) | 7275 (35.3)  | 2720 (37.1) | 1638 (42.0) | 406 (46.1) | 204 (49.3) | 39602 (28.2) |        |
| Unknown                                       | 6516 (12.3)  | 5597 (10.2)  | 1784 (8.7)   | 590 (8.1)   | 265 (6.8)   | 64 (7.3)   | 27 (6.5)   | 14843 (10.6) |        |
| <b>Treatment Facility Annual Volume</b>       |              |              |              |             |             |            |            |              |        |
| 0-17 patients (1 <sup>st</sup> Quartile)      | 3813 (7.2)   | 2913 (5.3)   | 897 (4.4)    | 297 (4.1)   | 160 (4.1)   | 29 (3.3)   | 22 (5.3)   | 8131 (5.8)   | <0.001 |
| 18-34 patients (2 <sup>nd</sup> Quartile)     | 8159 (15.4)  | 6281 (11.5)  | 2216 (10.8)  | 852 (11.6)  | 413 (10.6)  | 91 (10.3)  | 42 (10.1)  | 18054 (12.8) |        |
| 35-67 patients (3 <sup>rd</sup> Quartile)     | 14087 (26.7) | 13449 (24.6) | 4742 (23.0)  | 1627 (22.2) | 876 (22.5)  | 191 (21.7) | 102 (24.6) | 35074 (24.9) |        |
| >67 patients (4 <sup>th</sup> Quartile)       | 26757 (50.7) | 32037 (58.6) | 12745 (61.9) | 4550 (62.1) | 2450 (62.8) | 569 (64.7) | 248 (59.9) | 79356 (56.4) |        |
| <b>Year of Diagnosis</b>                      |              |              |              |             |             |            |            |              |        |
| 2004                                          | 2298 (4.4)   | 1556 (2.8)   | 552 (2.7)    | 203 (2.8)   | 110 (2.8)   | 21 (2.4)   | 18 (4.3)   | 4758 (3.4)   | <0.001 |
| 2005                                          | 2427 (4.6)   | 1797 (3.3)   | 638 (3.1)    | 245 (3.3)   | 164 (4.2)   | 27 (3.1)   | 20 (4.8)   | 5318 (3.8)   |        |
| 2006                                          | 2854 (5.4)   | 2070 (3.8)   | 738 (3.6)    | 330 (4.5)   | 186 (4.8)   | 41 (4.7)   | 19 (4.6)   | 6238 (4.4)   |        |
| 2007                                          | 2994 (5.7)   | 2740 (5.0)   | 1015 (4.9)   | 387 (5.3)   | 240 (6.2)   | 43 (4.9)   | 25 (6.0)   | 7444 (5.3)   |        |
| 2008                                          | 4831 (9.1)   | 4610 (8.4)   | 1777 (8.6)   | 646 (8.8)   | 371 (9.5)   | 84 (9.5)   | 44 (10.6)  | 12363 (8.8)  |        |
| 2009                                          | 5602 (10.6)  | 5693 (10.4)  | 2155 (10.5)  | 759 (10.4)  | 386 (9.9)   | 87 (9.9)   | 31 (7.5)   | 14713 (10.5) |        |
| 2010                                          | 5955 (11.3)  | 5979 (10.9)  | 2257 (11.0)  | 845 (11.5)  | 429 (11.0)  | 114 (13.0) | 57 (13.8)  | 15636 (11.1) |        |
| 2011                                          | 6293 (11.9)  | 6848 (12.5)  | 2374 (11.5)  | 826 (11.3)  | 447 (11.5)  | 108 (12.3) | 58 (14.0)  | 16954 (12.1) |        |
| 2012                                          | 6521 (12.3)  | 7336 (13.4)  | 2867 (13.9)  | 950 (13.0)  | 500 (12.8)  | 102 (11.6) | 44 (10.6)  | 18320 (13.0) |        |
| 2013                                          | 6679 (12.6)  | 8038 (14.7)  | 3132 (15.2)  | 1066 (14.6) | 549 (14.1)  | 119 (13.5) | 43 (10.4)  | 19626 (14.0) |        |
| 2014                                          | 6362 (12.0)  | 8013 (14.7)  | 3095 (15.0)  | 1069 (14.6) | 517 (13.3)  | 134 (15.2) | 55 (13.3)  | 19245 (13.7) |        |
| <b>Charlson Comorbidity Score</b>             |              |              |              |             |             |            |            |              |        |

|                                     |              |              |              |             |             |            |            |               |        |
|-------------------------------------|--------------|--------------|--------------|-------------|-------------|------------|------------|---------------|--------|
| 0                                   | 45482 (86.1) | 46939 (85.8) | 17621 (85.5) | 6233 (85.1) | 3299 (84.6) | 756 (85.9) | 346 (83.6) | 120676 (85.8) | 0.001  |
| 1                                   | 6250 (11.8)  | 6501 (11.9)  | 2470 (12.0)  | 901 (12.3)  | 503 (12.9)  | 104 (11.8) | 51 (12.3)  | 16780 (11.9)  |        |
| 2                                   | 928 (1.8)    | 1043 (1.9)   | 416 (2.0)    | 158 (2.2)   | 84 (2.2)    | ∅          | ∅          | 2659 (1.9)    |        |
| ≥3                                  | 156 (0.3)    | 197 (0.4)    | 93 (0.5)     | 34 (0.5)    | 13 (0.3)    | ∅          | ∅          | 500 (0.4)     |        |
| <b>Grade</b>                        |              |              |              |             |             |            |            |               |        |
| Well Differentiated                 | 6800 (12.9)  | 6649 (12.2)  | 2367 (11.5)  | 895 (12.2)  | 469 (12.0)  | ∅          | ∅          | 17357 (12.3)  | <0.001 |
| Moderately Differentiated           | 17226 (32.6) | 18453 (33.7) | 7192 (34.9)  | 2554 (34.9) | 1410 (36.2) | 311 (35.3) | 154 (37.2) | 47300 (33.6)  |        |
| Poorly Differentiated               | 17543 (33.2) | 18542 (33.9) | 6921 (33.6)  | 2396 (32.7) | 1258 (32.3) | 265 (30.1) | 114 (27.5) | 47039 (33.5)  |        |
| Undifferentiated/Anaplastic         | 1426 (2.7)   | 1376 (2.5)   | 547 (2.7)    | 200 (2.7)   | 103 (2.6)   | ∅          | ∅          | 3684 (2.6)    |        |
| Unknown                             | 9821 (18.6)  | 9660 (17.7)  | 3573 (17.3)  | 1281 (17.5) | 659 (16.9)  | 162 (18.4) | 79 (19.1)  | 25235 (17.9)  |        |
| <b>Surgery Type</b>                 |              |              |              |             |             |            |            |               |        |
| Breast Conservation                 | 40934 (77.5) | 33857 (61.9) | 9735 (47.3)  | 2925 (39.9) | 1292 (33.1) | 260 (29.5) | 153 (37.0) | 89156 (63.4)  | <0.001 |
| Mastectomy                          | 7865 (14.9)  | 9576 (17.5)  | 4262 (20.7)  | 1736 (23.7) | 1070 (27.4) | 268 (30.5) | 128 (30.9) | 24905 (17.7)  |        |
| Mastectomy & Reconstruction         | 4017 (7.6)   | 11247 (20.6) | 6603 (32.1)  | 2665 (36.4) | 1537 (39.4) | 352 (40.0) | 133 (32.1) | 26554 (18.9)  |        |
| <b>Receipt of Chemotherapy</b>      |              |              |              |             |             |            |            |               |        |
| Yes                                 | 1309 (2.5)   | 1827 (3.3)   | 767 (3.7)    | 254 (3.5)   | 121 (3.1)   | ∅          | ∅          | 4305 (3.1)    | <0.001 |
| No                                  | 51507 (97.5) | 52853 (96.7) | 19833 (96.3) | 7072 (96.5) | 3778 (96.9) | ∅          | ∅          | 136310 (96.9) |        |
| <b>Receipt of Radiotherapy</b>      |              |              |              |             |             |            |            |               |        |
| Yes                                 | 32175 (60.9) | 26970 (49.3) | 7619 (37.0)  | 2168 (29.6) | 888 (22.8)  | 160 (18.2) | 89 (21.5)  | 70069 (49.8)  | <0.001 |
| No                                  | 20641 (39.1) | 27710 (50.7) | 12981 (63.0) | 5158 (70.4) | 3011 (77.2) | 720 (81.8) | 325 (78.5) | 70546 (50.2)  |        |
| <b>Receipt of Endocrine Therapy</b> |              |              |              |             |             |            |            |               |        |
| Yes                                 | 22734 (43.0) | 21242 (38.8) | 7131 (34.6)  | 2314 (31.6) | 1030 (26.4) | 199 (22.6) | 84 (20.3)  | 54734 (38.9)  | <0.001 |
| No                                  | 30082 (57.0) | 33438 (61.2) | 13469 (65.4) | 5012 (68.4) | 2869 (73.6) | 681 (77.4) | 330 (79.7) | 85881 (61.1)  |        |
| <b>Tumor Size‡</b>                  |              |              |              |             |             |            |            |               |        |
| <10mm                               | 2895 (60.3)  | 4135 (60.6)  | 1896 (61.4)  | 696 (61.4)  | 397 (62.4)  | 76 (61.8)  | 28 (47.5)  | 10123 (60.7)  | 0.003  |
| 10-19mm                             | 740 (15.4)   | 1083 (15.9)  | 475 (15.4)   | 194 (17.1)  | 84 (13.2)   | ∅          | ∅          | 2609 (15.7)   |        |
| ≥20mm                               | 373 (7.8)    | 482 (7.1)    | 213 (6.9)    | 61 (5.4)    | 63 (9.9)    | ∅          | ∅          | 1207 (7.2)    |        |
| Unknown                             | 792 (16.5)   | 1127 (16.5)  | 505 (16.3)   | 183 (16.1)  | 92 (14.5)   | ∅          | ∅          | 2729 (16.4)   |        |
| <b>Pathologic Stage</b>             |              |              |              |             |             |            |            |               |        |
| 0                                   | 48016 (90.9) | 47853 (87.5) | 17511 (85.0) | 6192 (84.5) | 3263 (83.7) | 757 (86.0) | 355 (85.7) | 123947 (88.1) | <0.001 |
| 1                                   | 4183 (7.9)   | 5952 (10.9)  | 2670 (13.0)  | 997 (13.6)  | 552 (14.2)  | 107 (12.2) | 46 (11.1)  | 14507 (10.3)  |        |
| 2                                   | 521 (1.0)    | 733 (1.3)    | 365 (1.8)    | 108 (1.5)   | 67 (1.7)    | ∅          | ∅          | 1818 (1.3)    |        |
| 3                                   | ∅            | ∅            | ∅            | ∅           | ∅           | ∅          | ∅          | 326 (0.2)     |        |
| 4                                   | ∅            | ∅            | ∅            | ∅           | ∅           | ∅          | ∅          | 17 (0.0)      |        |
| <b>Estrogen Receptor Status</b>     |              |              |              |             |             |            |            |               |        |
| Negative                            | 7353 (13.9)  | 7777 (14.2)  | 2974 (14.4)  | 1006 (13.7) | 560 (14.4)  | 110 (12.5) | 56 (13.5)  | 19836 (14.1)  | <0.001 |
| Positive                            | 39872 (75.5) | 42061 (76.9) | 15811 (76.8) | 5633 (76.9) | 2953 (75.7) | 672 (76.4) | 303 (73.2) | 107305 (76.3) |        |



|         |             |            |            |           |           |           |           |             |  |
|---------|-------------|------------|------------|-----------|-----------|-----------|-----------|-------------|--|
| Unknown | 5591 (10.6) | 4842 (8.9) | 1815 (8.8) | 687 (9.4) | 386 (9.9) | 98 (11.1) | 55 (13.3) | 13474 (9.6) |  |
|---------|-------------|------------|------------|-----------|-----------|-----------|-----------|-------------|--|

\*, percent of adults without a high school diploma by zip code; ‡, patients with invasive disease only; *d*, as per NCDB requirements, cells containing <11 individuals and any cells making them calculable have been censored.

**eTable 7: Point Estimates for 5-Year Overall Survival**

| <b>Cohort</b> | <b>Notes</b>                                                                      | <b>OS Point Estimates</b> |
|---------------|-----------------------------------------------------------------------------------|---------------------------|
| All Patients  | Unadjusted                                                                        | 95.8%                     |
| By Invasion   |                                                                                   |                           |
| No Invasion   | Model-based, averaged over all covariates, including delay                        | 96.0%                     |
| Invasion      | Model-based, averaged over all covariates, including delay                        | 94.9%                     |
| By Delay      |                                                                                   |                           |
| TTS 0 months  | Model-based, averaged over all covariates, including invasion but excluding delay | 96.3%                     |
| TTS 3 months  | Model-based, averaged over all covariates, including invasion but excluding delay | 95.4%                     |
| TTS 6 months  | Model-based, averaged over all covariates, including invasion but excluding delay | 94.4%                     |

OS, overall survival; TTS, time to surgery.

**eTable 8: Sensitivity Analysis Examining Association between Patient Characteristics and Invasion in Patients with One Surgery Date Recorded (N=101,251)**

| Characteristic                                             | OR (95%CI)           | P       |
|------------------------------------------------------------|----------------------|---------|
| <b>Delay from Diagnosis to Surgery (30-Day Interval) §</b> | 1.120 (1.095, 1.146) | < 0.001 |
| <b>Age (years)</b>                                         |                      |         |
| <50                                                        | Ref                  |         |
| 50-59                                                      | 0.752 (0.716, 0.791) | < 0.001 |
| 60-69                                                      | 0.696 (0.655, 0.740) | < 0.001 |
| ≥70                                                        | 0.672 (0.622, 0.727) | < 0.001 |
| <b>Race</b>                                                |                      |         |
| White                                                      | Ref                  |         |
| Black                                                      | 1.034 (0.960, 1.114) | 0.375   |
| Asian                                                      | 1.023 (0.910, 1.150) | 0.699   |
| Other/Unknown                                              | 0.804 (0.676, 0.957) | 0.014   |
| <b>Ethnicity</b>                                           |                      |         |
| Non-Hispanic                                               | Ref                  |         |
| Hispanic                                                   | 1.061 (0.961, 1.171) | 0.242   |
| Unknown                                                    | 0.897 (0.777, 1.035) | 0.137   |
| <b>Insurance</b>                                           |                      |         |
| Private                                                    | Ref                  |         |
| Medicaid                                                   | 1.205 (1.097, 1.323) | < 0.001 |
| Medicare                                                   | 0.964 (0.902, 1.030) | 0.274   |
| Uninsured                                                  | 1.129 (0.961, 1.328) | 0.141   |
| Government                                                 | 0.979 (0.808, 1.186) | 0.830   |
| Unknown                                                    | 0.738 (0.547, 0.996) | 0.047   |
| <b>Education*</b>                                          |                      |         |
| >21%                                                       | Ref                  |         |
| 13-20.9%                                                   | 0.959 (0.879, 1.045) | 0.339   |
| 7-12.9%                                                    | 1.023 (0.929, 1.126) | 0.648   |
| <7%                                                        | 1.070 (0.958, 1.196) | 0.230   |
| Missing                                                    | 0.489 (0.148, 1.613) | 0.240   |
| <b>Annual Income</b>                                       |                      |         |
| <\$38,000                                                  | Ref                  |         |
| \$38,000 - \$47,999                                        | 1.113 (1.019, 1.215) | 0.018   |
| \$48,000 - \$62,999                                        | 1.121 (1.016, 1.237) | 0.023   |
| ≥\$63,000                                                  | 1.083 (0.962, 1.220) | 0.186   |
| Missing                                                    | 2.493 (0.971, 6.399) | 0.058   |
| <b>Setting</b>                                             |                      |         |
| Large Metropolitan                                         | Ref                  |         |
| Small Metropolitan                                         | 0.894 (0.817, 0.978) | 0.015   |
| Suburban                                                   | 0.970 (0.858, 1.098) | 0.634   |
| Rural                                                      | 0.888 (0.775, 1.018) | 0.089   |
| Unknown                                                    | 1.120 (0.969, 1.294) | 0.125   |
| <b>Distance to Treatment Facility (miles)</b>              |                      |         |
| ≤10                                                        | Ref                  |         |
| 11-20                                                      | 1.014 (0.962, 1.069) | 0.600   |
| 21-40                                                      | 1.143 (1.050, 1.244) | 0.002   |
| >40                                                        | 1.326 (1.195, 1.471) | < 0.001 |
| Unknown                                                    | 0.638 (0.295, 1.379) | 0.253   |
| <b>Transfer of Care</b>                                    |                      |         |

|                                           |                      |         |
|-------------------------------------------|----------------------|---------|
| No                                        | Ref                  |         |
| Yes                                       | 1.214 (1.139, 1.295) | < 0.001 |
| Unknown                                   | 1.077 (0.984, 1.178) | 0.107   |
| <b>Treatment Facility Annual Volume</b>   |                      |         |
| 0-17 patients (1 <sup>st</sup> Quartile)  | Ref                  |         |
| 18-34 patients (2 <sup>nd</sup> Quartile) | 1.045 (0.903, 1.209) | 0.554   |
| 35-67 patients (3 <sup>rd</sup> Quartile) | 1.148 (0.993, 1.327) | 0.063   |
| >67 patients (4 <sup>th</sup> Quartile)   | 1.302 (1.133, 1.496) | < 0.001 |
| <b>Year of Diagnosis §</b>                | 1.041 (1.028, 1.055) | < 0.001 |
| <b>Charlson Comorbidity Score</b>         |                      |         |
| 0                                         | Ref                  |         |
| 1                                         | 1.127 (1.058, 1.201) | < 0.001 |
| 2                                         | 1.308 (1.138, 1.503) | < 0.001 |
| ≥3                                        | 1.178 (0.844, 1.644) | 0.335   |
| <b>Grade</b>                              |                      |         |
| Well Differentiated                       | Ref                  |         |
| Moderately Differentiated                 | 0.535 (0.500, 0.572) | < 0.001 |
| Poorly Differentiated                     | 0.253 (0.233, 0.274) | < 0.001 |
| Undifferentiated/Anaplastic               | 0.085 (0.066, 0.111) | < 0.001 |
| Unknown                                   | 0.338 (0.290, 0.394) | < 0.001 |
| <b>Estrogen Receptor Status</b>           |                      |         |
| Negative                                  | Ref                  |         |
| Positive                                  | 0.375 (0.353, 0.398) | < 0.001 |
| Unknown                                   | 0.108 (0.093, 0.126) | < 0.001 |

CI, confidence interval; OR, odds ratio; Ref, reference group; \*, percent of adults without a high school diploma by zip code; §, continuous variable.

**eTable 9: Sensitivity Analysis Comparing 5-Year Overall Survival from Time of Diagnosis versus Time of Surgery**

| Time to Surgery (days) | OS as Time from Surgery | OS as Time from Diagnosis | Analysis of Maximum Likelihood Estimates |                                  |          |                                        |                                    |          |
|------------------------|-------------------------|---------------------------|------------------------------------------|----------------------------------|----------|----------------------------------------|------------------------------------|----------|
|                        |                         |                           | Time from Surgery Parameter Estimate     | Time from Surgery Standard Error | <i>P</i> | Time from Diagnosis Parameter Estimate | Time from Diagnosis Standard Error | <i>P</i> |
| 1-30                   | 0.9610                  | 0.9607                    |                                          |                                  |          |                                        |                                    |          |
| 31-60                  | 0.9576                  | 0.9604                    | 0.03678                                  | 0.01723                          | 0.0328   | 0.02025                                | 0.01722                            | 0.2397   |
| 61-90                  | 0.9544                  | 0.9576                    | 0.12031                                  | 0.01697                          | <0.0001  | 0.08179                                | 0.01697                            | <0.0001  |
| 91-120                 | 0.9540                  | 0.9547                    | 0.27774                                  | 0.01655                          | <0.0001  | 0.21588                                | 0.01654                            | <0.0001  |
| 121-365                | 0.9365                  | 0.9437                    | 0.40979                                  | 0.01616                          | <0.0001  | 0.30257                                | 0.01615                            | <0.0001  |

OS, overall survival.

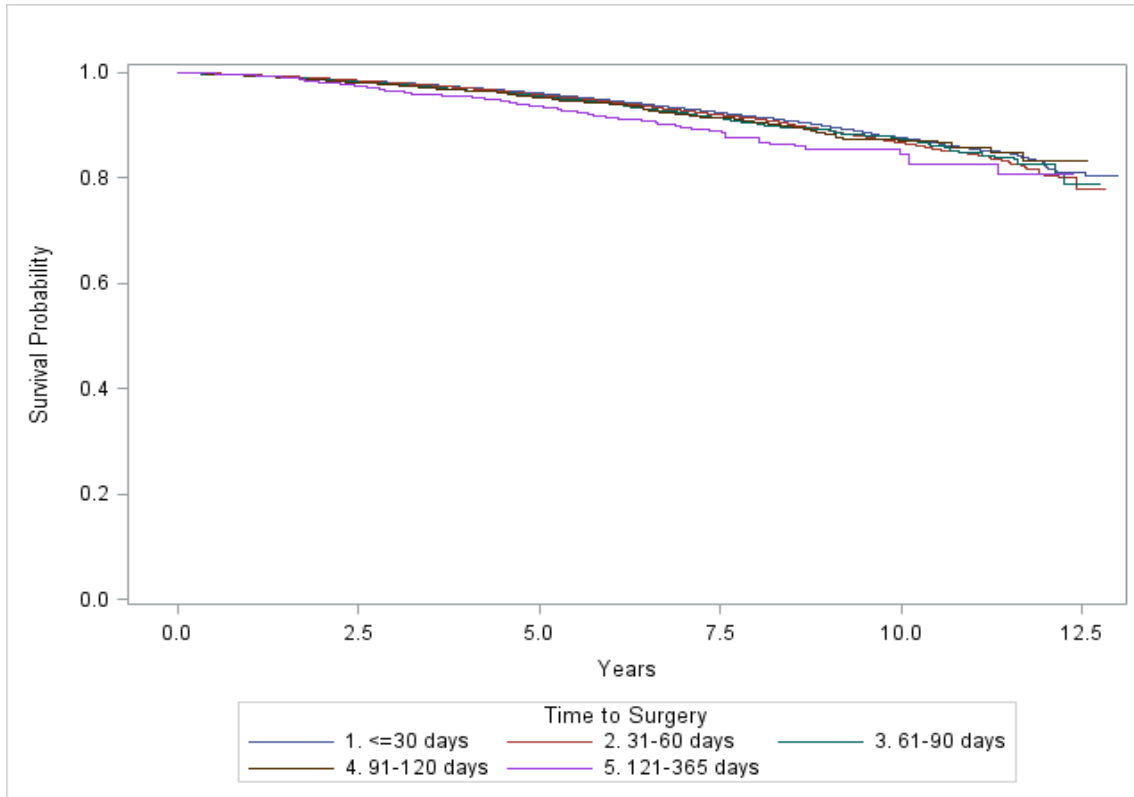

CI: confidence interval; DCIS: ductal carcinoma in situ; OS: overall survival.

| <b>Time to Surgery<br/>(days)</b> | <b>5-Year OS Probability</b> | <b>95% CI</b>    |
|-----------------------------------|------------------------------|------------------|
| 0-30                              | 0.9610                       | 0.95706, 0.96157 |
| 31-60                             | 0.9576                       | 0.95356, 0.95784 |
| 61-90                             | 0.9544                       | 0.94719, 0.95542 |
| 91-120                            | 0.9540                       | 0.93953, 0.95515 |
| 121-365                           | 0.9365                       | 0.90834, 0.93619 |

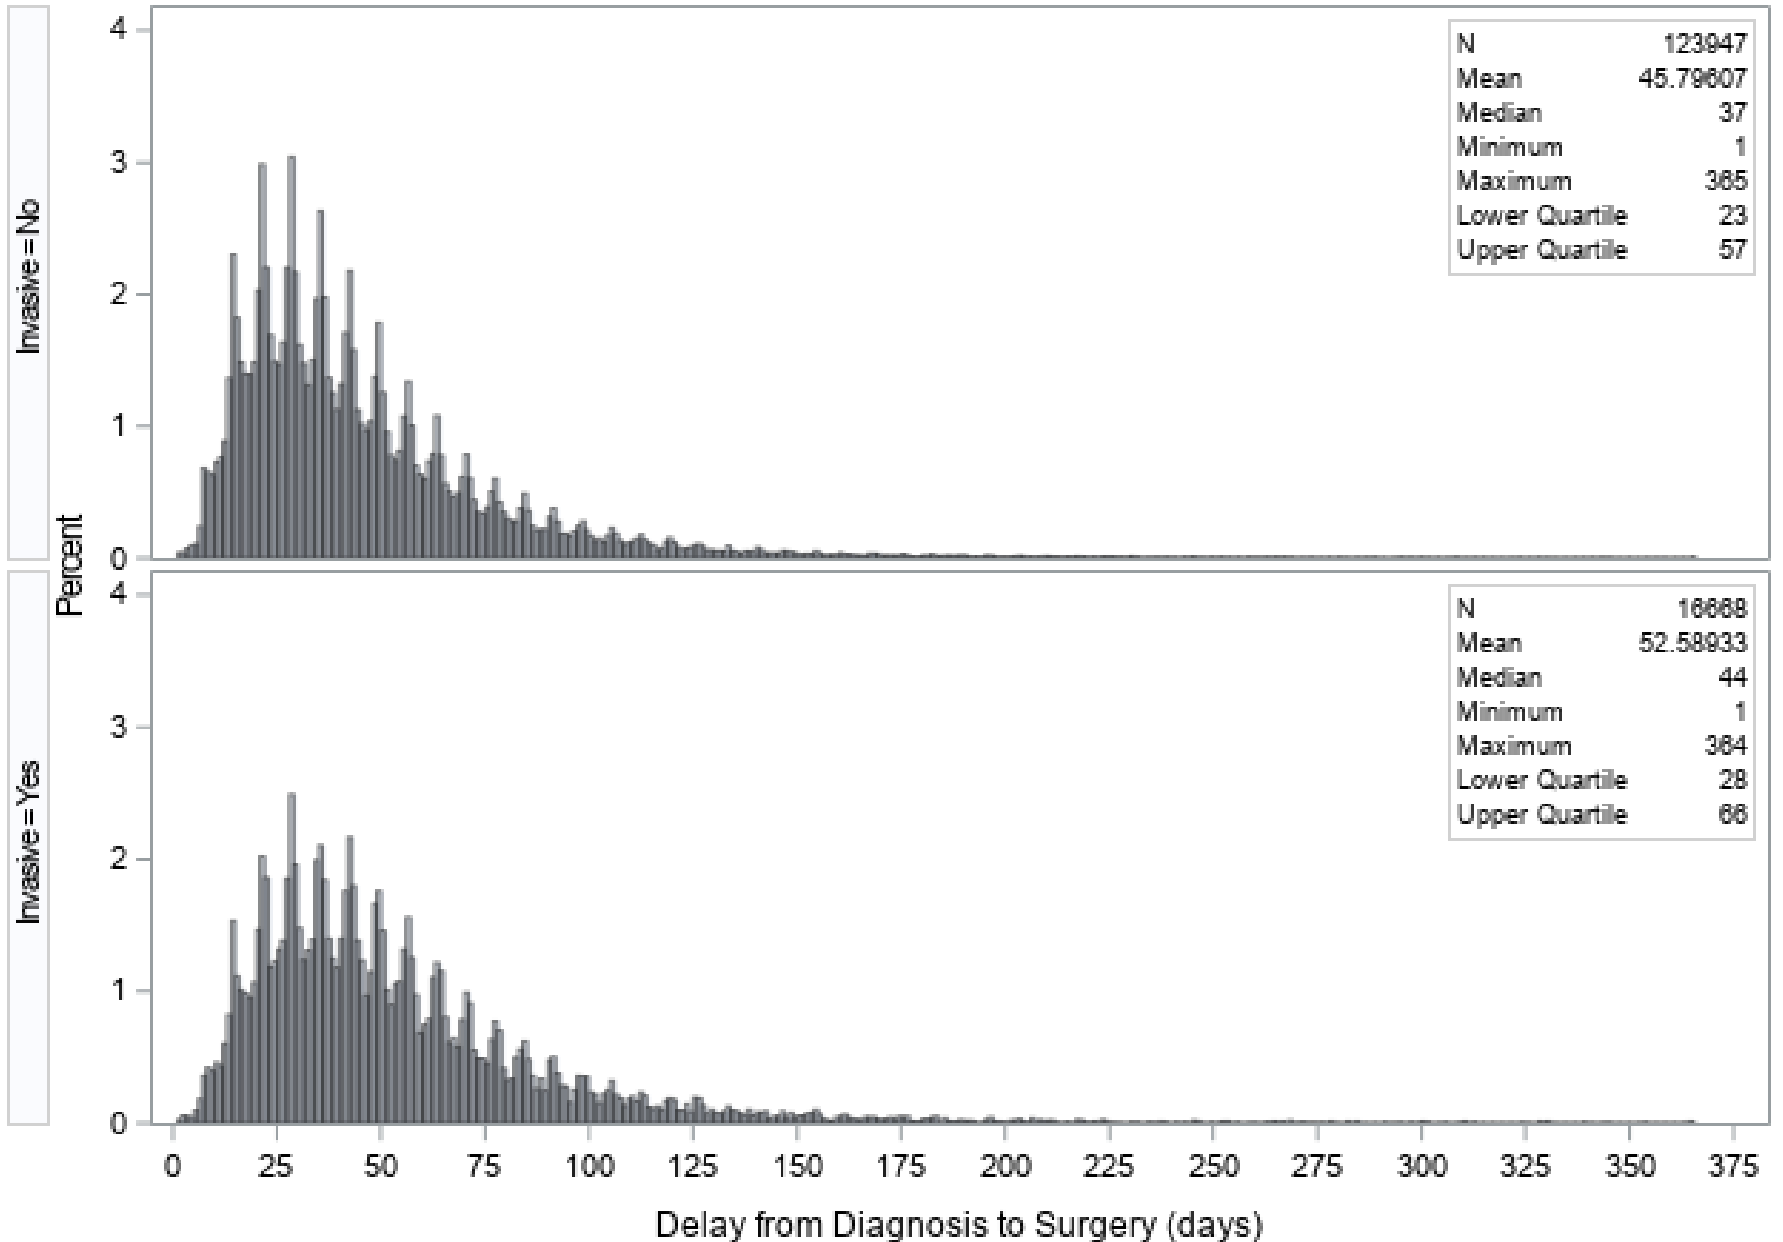

Supplement: 10434_2019_7844_MOESM1_ESM.pdf [file 10434_2019_7844_MOESM1_ESM.pdf]
